# Supplementary material
Source: PubMed Central journal article supplement (PMC6357961)

### cProt levels by ISS stage

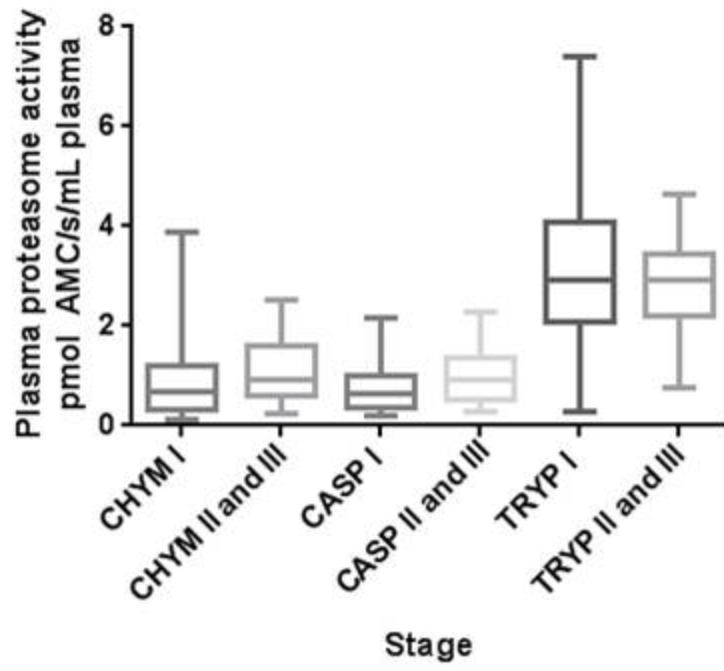

Supplement: NIHMS1008571-supplement-Fig_1.pdf [file NIHMS1008571-supplement-Fig_1.pdf]

Figure 4A

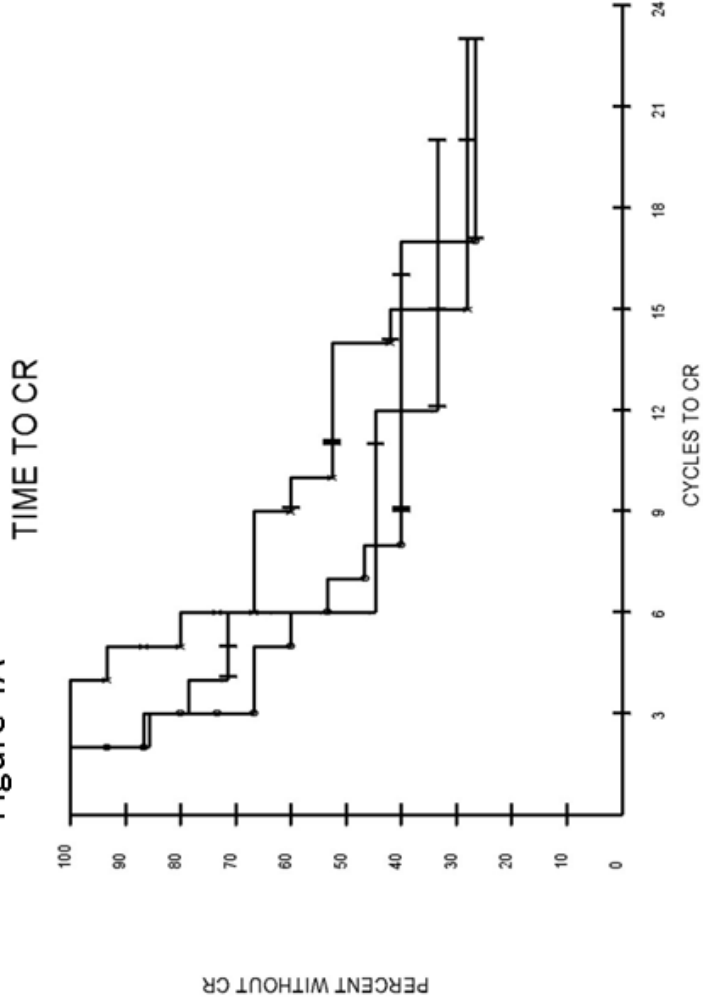

Figure 4B

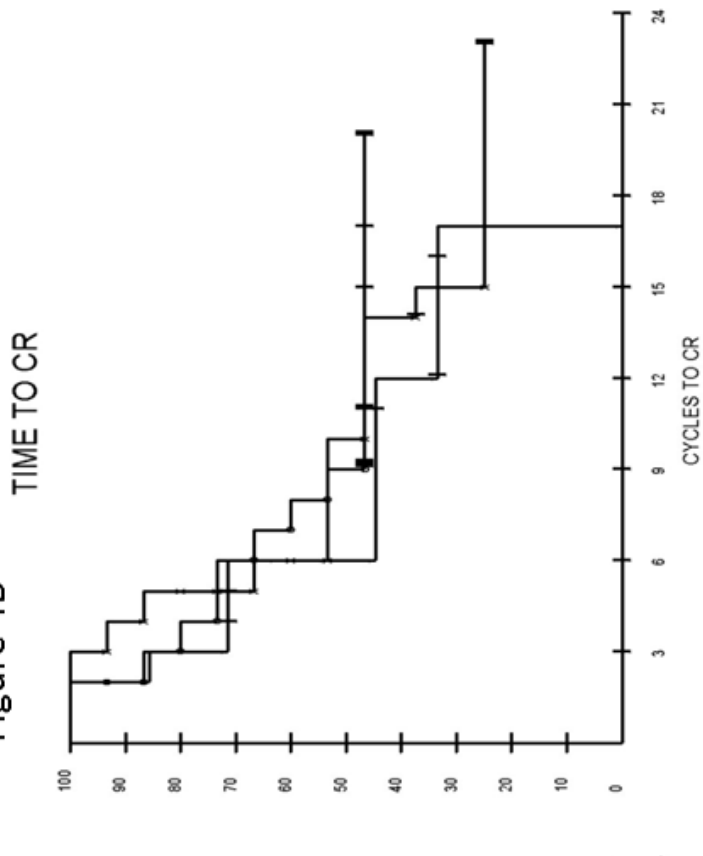

Figure 4C

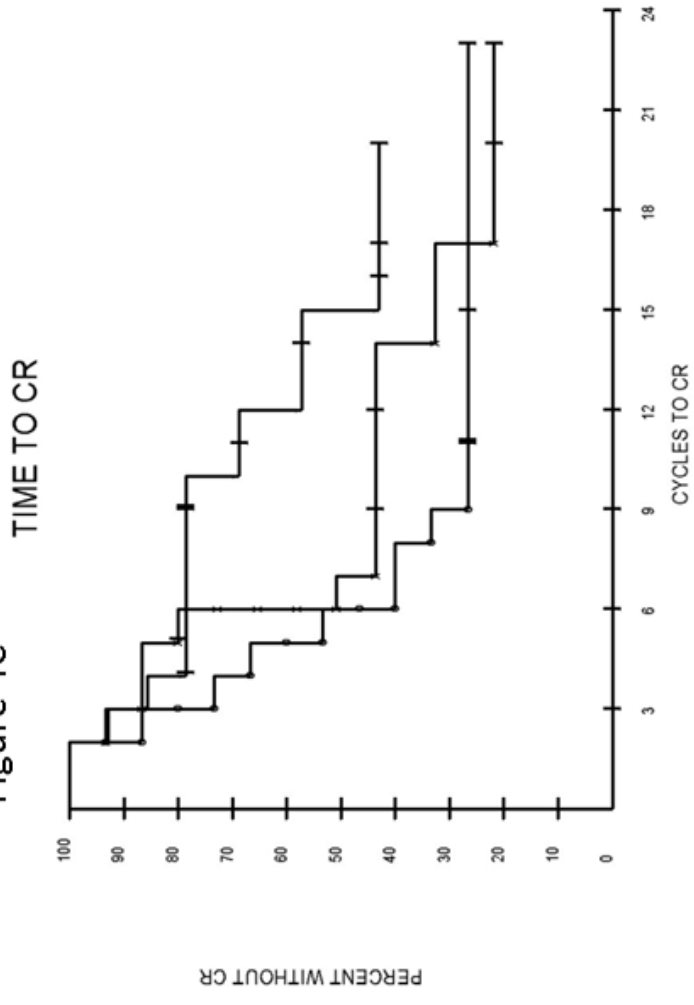

Supplement: NIHMS1008571-supplement-Fig_3.pdf [file NIHMS1008571-supplement-Fig_3.pdf]
